# Supplementary material
Source: PubMed Central journal article supplement (PMC8921751)
Supplement: eccojc_14_10_1462_s5.pdf [file eccojc_14_10_1462_s5.pdf]

## SUPPLEMENTARY MATERIAL

### **Gut microbiota derived propionate regulates the expression of Reg3 mucosal lectins and ameliorates experimental colitis in mice**

#### Authors:

Danica Bajic<sup>1\*</sup>, Adrian Niemann<sup>1\*</sup>, Anna-Katharina Hillmer<sup>1</sup>, Raquel Mejias-Luque<sup>2,5</sup>, Sena Bluemel<sup>3,5</sup>, Melissa Docampo<sup>4</sup>, Maja C. Funk<sup>6</sup>, Elena Tonin<sup>6</sup>, Michael Boutros<sup>6</sup>, Bernd Schnabl<sup>3</sup>, Dirk H. Busch<sup>2,7</sup>, Tsuyoshi Miki<sup>8</sup>, Roland M. Schmid<sup>1</sup>, Marcel RM van den Brink<sup>4</sup>, Markus Gerhard<sup>2,7</sup>, Christoph K. Stein-Thoeringer<sup>1,9</sup>

#### Affiliation:

<sup>1</sup>Klinik für Innere Medizin II, Klinikum rechts der Isar, Techn. Univ. Munich, Germany

<sup>2</sup>Institute for Medical Microbiology, Immunology and Hygiene, Techn. Univ. Munich, Germany

<sup>3</sup>UC San Diego School of Medicine, Division of Gastroenterology, USA

<sup>4</sup>Memorial Sloan-Kettering Cancer Center, Immunology Program, USA

<sup>5</sup>University Hospital Zurich, Division of Gastroenterology and Hepatology, Zurich, Switzerland

<sup>6</sup>Division Signaling and Functional Genomics, German Cancer Research Center (DKFZ) and Heidelberg University, Heidelberg, Germany

<sup>7</sup>German Center for Infection Research (DZIF), Partner Site Munich, Munich, Germany

<sup>8</sup>Department of Microbiology, School of Pharmacy, Kitasato University, Japan

<sup>9</sup>Division Microbiome and Cancer, German Cancer Research Center (DKFZ), Heidelberg, Germany

## Supplementary Figure 1.

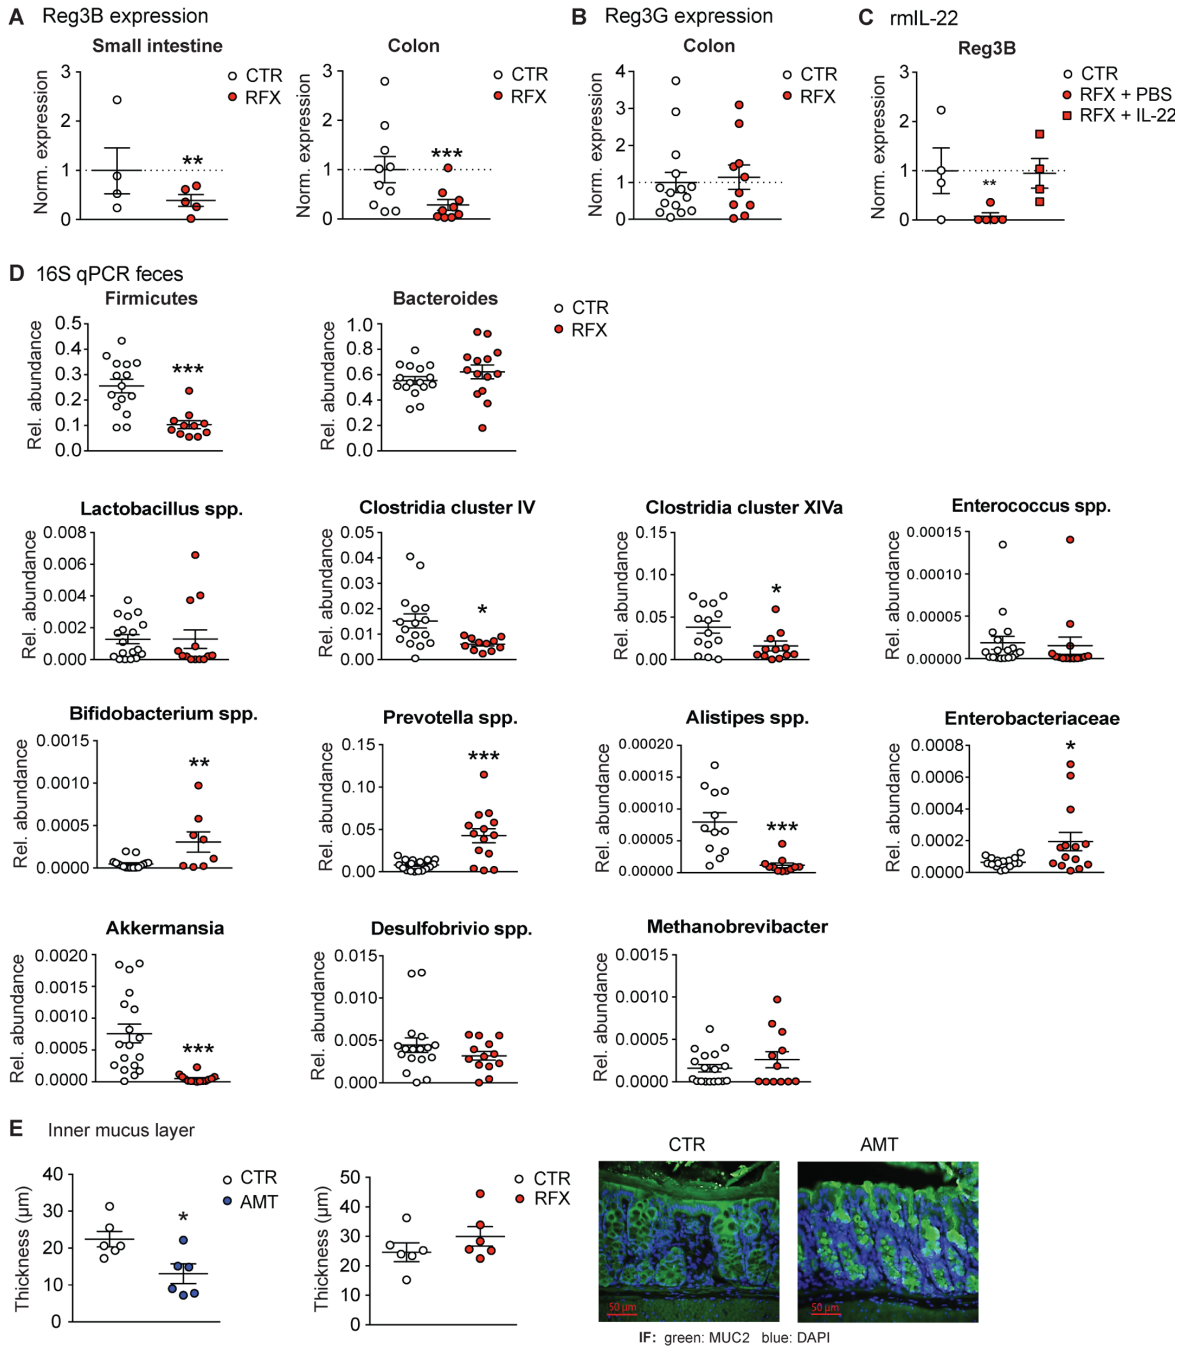

Antibiotic-induced Reg3 modulation and microbiota changes. (A) Reduced expression of RegB after treatment with RFX in the small intestine (*left*) and in the colon (*right*) compared to untreated SPF mice (CTR); (B) No change of RegG expression in the colon after RFX administration. (C) Three injections (i.p., every 12h) of rmlL-22 (4 $\mu\text{g}$ ; according to Lindemans et al., Nature 2015) rescued the expression of Reg3B in the cecum of RFX-treated mice. (D) GULDA-based 16S rRNA qPCR approach to assess microbiota changes after RFX treatment in SPF mice. (E) *Left*, thickness of inner mucus layer in AMT or RFX treated mice compared to controls measured in colonic sections by immunofluorescence

anti-MUC2 antibody staining; *right*, representative photomicrographs for MUC2 immunofluorescence of colon sections from AMT mice vs. controls (MUC2, green; DAPI, blue; scale bars 50 $\mu$ m). Data are means  $\pm$  S.E.M.. \* $p$ <0.05, \*\* $p$ <0.01, \*\*\* $p$ <0.001; n = 4 – 16 mice / group.

## Supplementary Figure 2.

Reg3B secretion from enterocytes in intestinal organoids

**A** steady state

red: Reg3B, green: Ki67, blue: DAPI

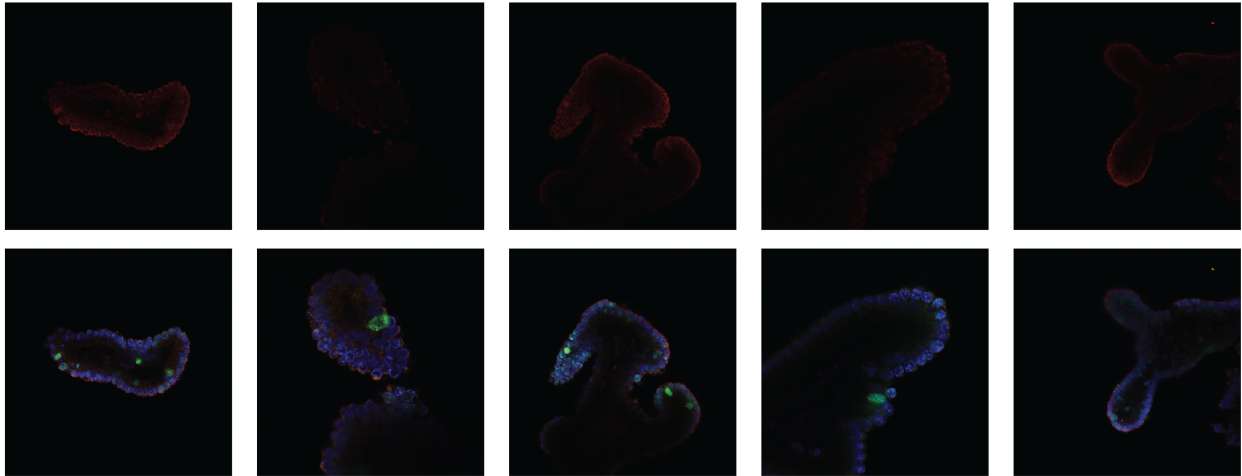

**B** propionate treatment

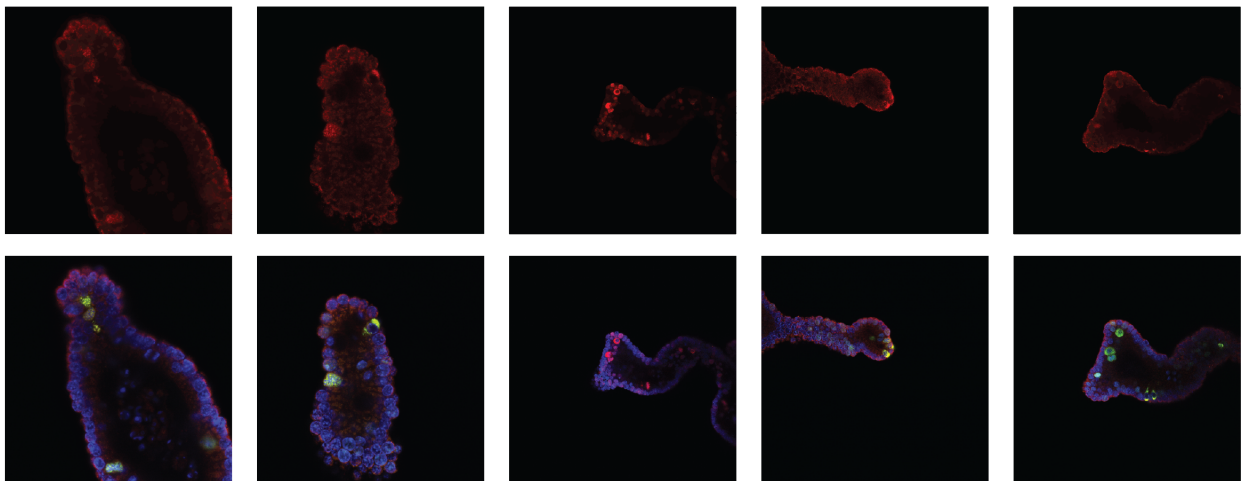

**C** rML-22 stimulation

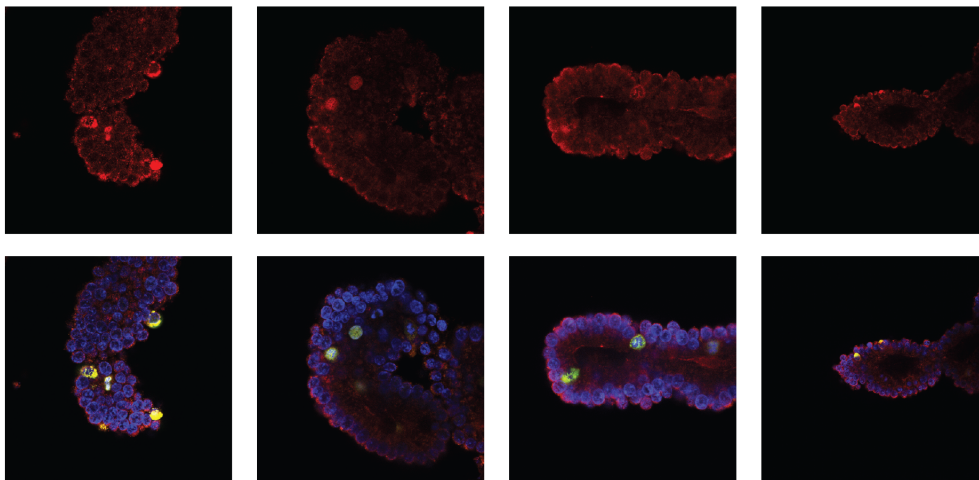

Reg3B in intestinal organoids from naïve C57BL/6 mice. Confocal images with immunohistochemical staining of Reg3B, Ki-67 or a nucleus staining with DAPI at (A) steady state, or (B) after propionate treatment (1mM, incubation for 12h) or (C) after stimulation with rmlL-22 (1ng/ml media; incubation for 12h). Top rows are 40x confocal images of anti-Reg3B immunofluorescence (red), and bottom rows merging of anti-Reg3B (red), -Ki67 (green) and DAPI staining (blue). For the organoid experiments, technical triplicates and 1 biological replicate were performed with images taken from different technical and biological replicates.

### Supplementary Figure 3.

#### A SCFAs in GPR43 KO mice

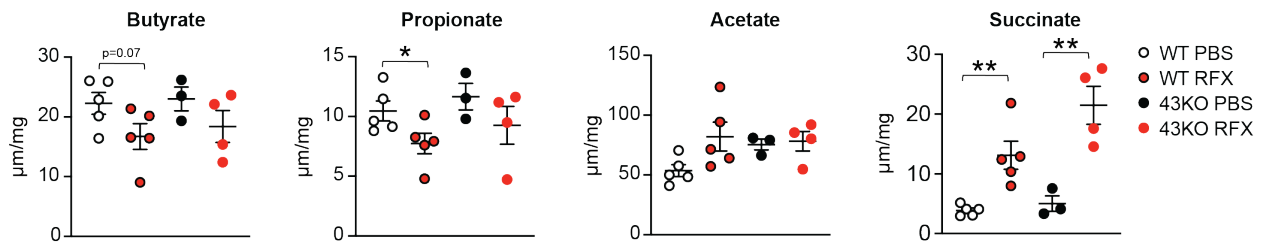

#### B GPR43-KO effects on intestinal organoids

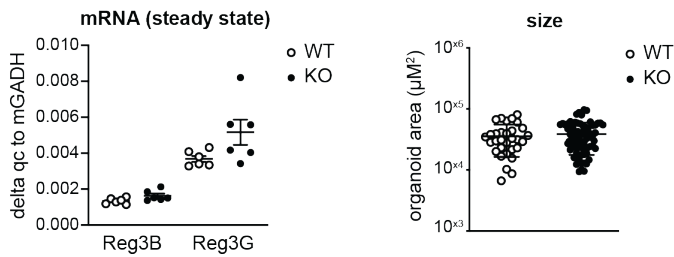

SCFA in GPR43-KO mice and intestinal organoid growth. (A) SCFA levels in cecal contents of wildtype littermate (WT) and GPR43 KO (43KO) mice receiving either PBS or rifaximin (RFX, 150mg/kg) for 10 days. (B) *Left*, non-different steady state expression levels of Reg3B and -G in WT and GPR43 KO mice without stimulation; *right*, area of cultured primary intestinal organoids of WT vs. GPR43 KO mice on day 5 after seeding organoids as a measure of growth kinetics.

## Supplementary Figure 4.

### A Intestinal organoids

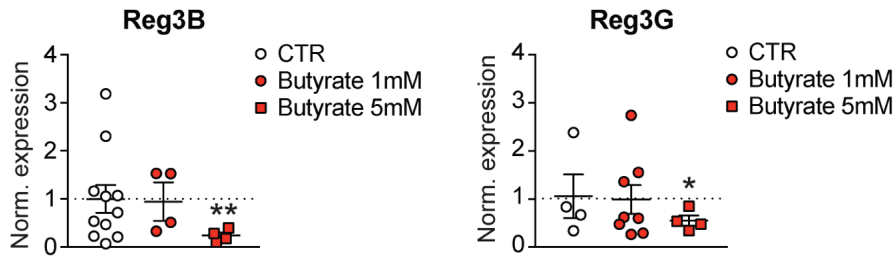

### B Gnotobiotic mice

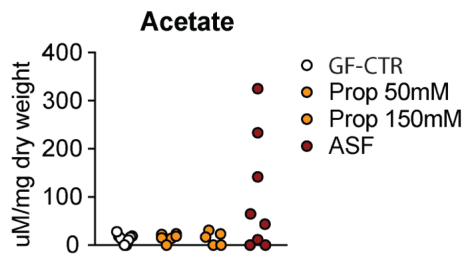

SCFA experiments in organoids and in gnotobiotic mice. (A) Butyrate administration to small intestine organoids reduced expression of Reg3B and Reg3G at high doses. (B) Cecum luminal contents of acetate after propionate treatment of germ-free (GF-CTR) mice vs. mice colonized with ASF. Data are means  $\pm$  S.E.M.. \* $p < 0.05$ , \*\* $p < 0.01$ ;  $n = 4 - 8$  organoid biological replicates or mice / group.

## Supplementary Figure 5.

**A** Baseline microbiota Reg3B KO mice

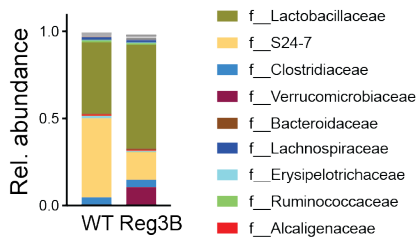

**B** Propionate in WT mice

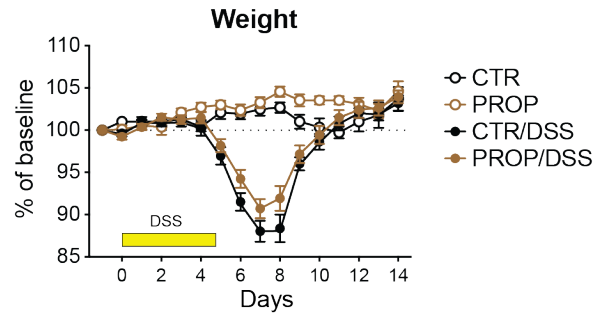

**C** Propionate in WT mice

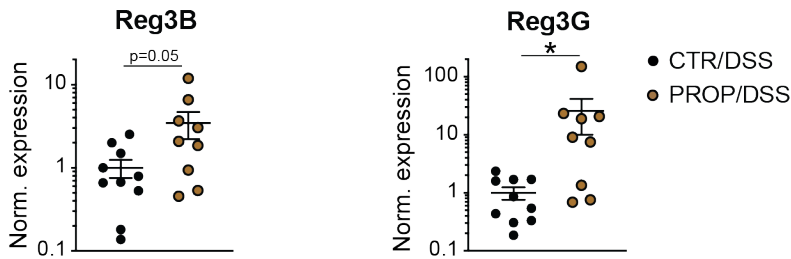

**D** RFX in WT mice

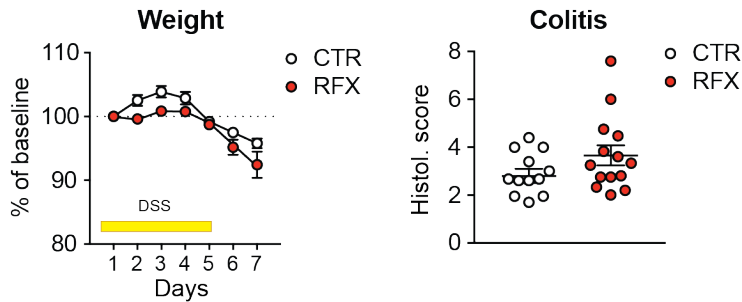

**E** Amp/Enro in WT mice

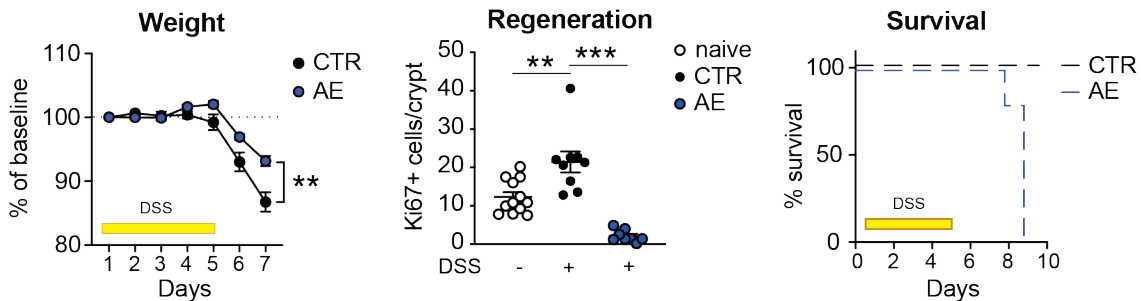

In vivo colitis experiments. (A) Relative abundances of fecal microbes at the family level averaged over 4 WT and 4 Reg3B KO mice (2 cages each) at steady state. (B) Weight changes of mice receiving water +/- propionate (50mM) or DSS +/- propionate (50mM) with DSS administered at 3% for 5 days. (C) Normalized expression of Reg3B/G mRNA in the colon of mice treated with 3% DSS plus propionate (PROP/DSS, n=9 mice) via drinking water or DSS alone (CTR/DSS, n=10 mice). (D) Body weight changes (*left*) and histological scores (*right*) in WT mice pretreated with RFX

vs. control for 10 days and followed by administering 2% DSS for 5 days (histologic score:  $p=0.11$  by T-test). (E) Changes in weight during 5 days of DSS treatment (*left*) and Ki67 staining of colonic sections of tissue harvested at day 7 after DSS start (vs. mice at steady state; *middle*) in mice treated with ampicillin/enrofloxacin (AE) 7 days before and during DSS; *right*, survival analysis in a separate batch of mice treated with AE and afterwards exposed to 4% DSS compared to control mice. Data are means  $\pm$  S.E.M.. \* $p<0.05$ , \*\* $p<0.01$ , \*\*\* $p<0.001$  (independent T-tests);  $n = 9$  – 15 mice / group.



## Supplementary Table 1.

Primers used for qPCR.

| Murine                   |                           |                           |
|--------------------------|---------------------------|---------------------------|
| Primer                   | <i>forward</i>            | <i>reverse</i>            |
| GAPDH                    | GCCTTCTCCATGGTGGTGAA      | GCACAGTCAAGGCCGAGAAT      |
| Reg3B                    | TCCAGGCTTATGGCTCCTA       | GCAGGCCAGTTCTGCATCA       |
| Reg3G                    | TTCCTGTCCTCCATGATCAAAA    | CATCCACCTCTGTTGGGTTCA     |
| Cryptidin-4              | GCTGTGTCTATCTCCTTTGGAGG   | CGTATTCCACAAGTCCCACGAAC   |
| Lysozyme                 | GATGGCTACCGTGGTGT         | CACCCATGCTCGAATG          |
| IL-22                    | CGCTGCCCGTCAACACCCGG      | CTGATCTTTAGCACTGACTCCTCG  |
| Bacterial                |                           |                           |
| Primer                   | <i>forward</i>            | <i>reverse</i>            |
| U1<br>universal          | ACTCCTACGGGAGGCAGCAGT     | GTATTACCGGGCTGCTGGCAC     |
| F1<br>Firmicutes         | TGAAACTYAAAGGAATTGACG     | ACCATGCACCACCTGTC         |
| F2<br>Lactobac. spp.     | AGCAGTAGGGAATCTTCCA       | CACCGCTACACATGGAG         |
| F6<br>Clostridia IV      | GCACAAGCAGTGGAGT          | CTTCCTCCGTTTTGTCAA        |
| F7<br>Clostridia XIV     | AAATGACGGTACCTGACTAA      | CTTTGAGTTTCATTCTTGCGAA    |
| F10<br>Enterococc. spp.  | CCCTTATTGTTAGTTGCCATCATT  | ACTCGTTGTACTIONCCCATTGT   |
| B1<br>Bacteroidetes      | GGARCATGTGGTTTAATTCGATGAT | AGCTGACGACAACCATGCAG      |
| B3<br>Bacteroid. spp.    | CGATGGATAGGGGTTCTGAGAGGA  | GCTGGCACGGAGTTAGCCGA      |
| B9<br>Prevotella spp.    | CACCAAGGCGACGATCA         | GGATAACGCCYGGACCT         |
| B10<br>Alistipes spp.    | TTAGAGATGGGCATGCGTTGT     | TGAATCCTCCGTATT           |
| A1<br>Bifidobact. spp.   | GCGTGCTTAACACATGCAAGTC    | CACCCGTTCCAGGAGCTATT      |
| V1<br>Akkermansia        | CAGCACGTGAAGGTGGGGAC      | CCTTGCGTTGGCTTCAGAT       |
| E1<br>Methanobrevibac.   | CCGGGTATCTAATCCGGTTC      | CTCCCAGGGTAGAGGTGAAA      |
| P1<br>Enterobacteriac.   | CATTGACGTTACCCGAGAAGAAGC  | CTCTACGAGACTCAAGCTTGC     |
| P3<br>Desulfovibrio spp. | CCGTAGATATCTGGAGGAACATCAG | ACATCTAGCATCCATCGTTTACAGC |
